# Supplementary material for: Users’ Perceptions of Access to and Quality of Unified Health System Services in Brazil: A Cross-Sectional Study and Implications to Healthcare Management Challenges
Source: MDPI journal article supplement (doi:10.3390/ijerph21060721), 2024-05-31
Supplement: s1 [file ijerph-2967425-supplementary.pdf › ijerph-2967425-supplementary.pdf]

# INSTRUMENT RESEARCH

## SECTION A

**Q01- REGION: 1.** ☐ Metropolitan 4. ☐ North Fluminense 2.☐ dos Lagos 3. ☐ Serrana

**Q02- SEX:**

1. ☐ Male
2. ☐ Female
3. ☐ Other
4. ☐ Don't know
5. ☐ Didn't answer

**Q03- AGE (years):** \_\_\_\_\_ years

**Q04- MARITAL STATUS:**

1. ☐ Single
2. ☐ Married
3. ☐ Widower
4. ☐ Stable relationship (friend)
5. ☐ Divorced or legally separated
6. ☐ Other
7. ☐ Don't know
8. ☐ No answer

**Q05- SKIN COLOR:**

1. ☐ White
2. ☐ Black
3. ☐ Brown ( brunette, mulata, cabocla cafuza, mameluca, mixed race )
4. ☐ Indigenous
5. ☐ Quilombola
6. ☐ Yellow ( Japanese, Chinese, Korean)
7. ☐ Other
8. ☐ Do not know
9. ☐ Did not answer

**Q06- EDUCATION:**

01. ☐ Illiterate
10. ☐ Incomplete elementary education (1st grade)
11. ☐ Complete elementary education 1st grade)
20. ☐ Incomplete high school education (2nd grade)
21. ☐ Complete secondary education (2nd grade)
30. ☐ Incomplete higher education (undergraduate)
31. ☐ Complete higher education (undergraduate)
40. ☐ Lato sensu postgraduate course (Specialization, MBA)
50. ☐ Master's
60. ☐ Doctorate
88. ☐ Don't know
99. ☐ No answer

**Q07- TOTAL INCOME IN THE HOUSEHOLD: Adding the income of all the residents of your residence, what would be the total amount?**

1. ☐ Up to 1 minimum wage (¥R\$ 1320.00)
2. ☐ 1-2 minimum wages (R\$ 1320.01 to R\$ 2640.00)
3. ☐ 2-3 minimum wages (R\$ 2640.01 to R\$ 3960.00)

4. ☐ 3-5 minimum wages (R\$ 3960.01 to R\$ 6600.00)  
5. ☐ 5-10 minimum wages (R\$ 6600.01 to R\$ 13200.00)  
6. ☐ 10-20 minimum wages (R\$ 13200.01 to R\$ 26400.00)  
7. ☐ More than 20 minimum wages (R\$ 26,400.01) \_\_\_\_\_  
8. ☐ Don't now  
9. ☐ Didn't answer

**Q08- NUMBER OF PEOPLE IN THE HOUSEHOLD?**

1. ☐ one  
2. ☐ two  
3. ☐ Three  
4. ☐ Four or more

**Q09- DO YOU HAVE A HEALTH PLAN?** 1. ☐ Yes 2. ☐ No 8. ☐ I don't know 9. ☐ No response

**Q10- DO YOU USE PUBLIC HEALTH SERVICES?** 1. ☐ Yes 2. ☐ No 8. ☐ I don't know 9. ☐ No answer

**SECTION B - CLINICAL CONDITIONS**

**Have you ever been told by a doctor or other healthcare professional that you have or have had the following**

**illnesses?** **Q101- Hypertension:** 1. ☐ Yes 2. ☐ No 8. ☐ I don't know

**Q102- Diabetes Mellitus:** 1. ☐ Yes 2. ☐ No 8. ☐ I don't know

**Q103- Heart diseases:** 1. ☐ Yes 2. ☐ No 8. ☐ I don't know

**Q104- Anxiety or depression:** 1. ☐ Yes 2. ☐ No 8. ☐ I don't know

**Q105- Arthritis, osteoarthritis, rheumatism:** 1. ☐ Yes 2. ☐ No 8. ☐ I don't know

**Q106- Stroke (cerebrovascular accident or "stroke"):** 1. ☐ Yes 2. ☐ No 8. ☐ I don't know

**Q107- Dyslipidemia (high cholesterol and/or high triglycerides):** 1. ☐ Yes 2. ☐ No 8. ☐ I don't know

**Q108- Chronic lung disease (asthma, bronchitis, emphysema, other):** 1. ☐ Yes 2. ☐ No 8. ☐ I don't know

**Q109- Other illness(es) lasting MORE THAN SIX MONTHS:** 1. ☐ Yes 2. ☐ No Which one(s)? \_\_\_\_\_

**SECTION C - MEDICATION USE**

**Q201A- Do you use PRESCRIPTION medicines?** 1. ☐ Yes 2. ☐ No 3. ☐ I don't know

**Q201B- How many?** 1. ☐ One 2. ☐ Two 3. ☐ Three 4. ☐ Four or more 88. ☐ I don't know 99. ☐ Not applicable

**Q302A- Do you use medicines WITHOUT A PRESCRIPTION**

? 1. ☐ Yes 2. ☐ No 3. ☐ I don't know

**Q302B- How many?** 1. ☐ One 2. ☐ Two 3. ☐ Three 4. ☐ Four or more 88. ☐ I don't know

99. ☐ Not applicable

**Q302C- In which cases do you use any medicine WITHOUT A PRESCRIPTION? (You can select more than one option)**

1. ☐ When you have medicine at home.  
2. ☐ When you have taken this medicine before.  
3. ☐ When you know someone who has already taken it and recommended it.  
4. ☐ When you get the easy remedy.  
5. When you receive a recommendation at the pharmacy. \_\_\_\_\_  
6. ☐ When you read the leaflet or other source of information (internet/social network).  
7. ☐ Other: \_\_\_\_\_

8. ☐ I don't know  
9. ☐ Not applicable

**Q401- Do you trust the medicines you use?**

1. ☐ Always 2. ☐ Most of the time 3. ☐ Rarely 4. ☐ Never 8. ☐ I don't know

**Q402- Do you receive medical advice regarding prescribed medications?**

1. ☐ Always 2. ☐ Most of the time 3. ☐ Rarely 4. ☐ Never 8. ☐ I don't know

**Q403- How do you consider the medical advice you receive regarding prescribed medications:**

1. ☐ Easy to understand  
2. ☐ Confusing  
3. ☐ Difficult  
4. ☐ I don't receive guidance  
8. ☐ I don't know  
9. ☐ No response

**Q404- Do you receive guidance from the pharmacist about the medicines do you use?**

1. ☐ Always 2. ☐ Most of the time 3. ☐ Rarely 4. ☐ Never 8. ☐ I don't know

**Q405- How do you consider the pharmaceutical advice you receive about the medicines you use:**

1. ☐ Easy to understand 2. ☐ Confusing 3. ☐ Difficult 4. ☐ I don't receive guidance 8. ☐ I don't know 9. ☐ No answer

**Q406- I will tell you some types of common difficulties that people face when dealing with medication.**

**Answer if you face each difficulty that I am going to talk about:**

*[Check all the options where the respondent says YES and asks "Any others?"]*

1. ☐ Get the medicine.  
2. ☐ Remember when to take your medicine  
3. ☐ Using many medications a day.  
4. ☐ Read what is written  
5. ☐ Adapt the use of the medicine to your work schedule.  
6. ☐ Confusing medicines that look on the packaging  
7. ☐ Other: \_\_\_\_\_  
8. ☐ Not using alcoholic beverages while taking any medication  
0. ☐ None.  
88. ☐ Don't know.  
99. ☐ No response

**SECTION D - PERCEPTIONS AND USE OF PUBLIC HEALTH SERVICES**

**Q501- Do you use public health services (SUS)?**

1. ☐ Always 2. ☐ Often 3. ☐ Sometimes 4. ☐ Rarely 5. ☐ Never 8. ☐ I don't know 9. ☐ I didn't want to answer

**Q502- What services do you use or have used from the SUS?**

1. ☐ Medical consultation 2. ☐ Dental consultation 3. ☐ Vaccination 4. ☐ Surgery 5. ☐ Acquisition of Medication 6. ☐ Organ transplant 7. ☐ Various services 8. ☐ Prenatal /Preventive 9. ☐ None 10. ☐ Don't know 11. ☐ Didn't want to answer

- If you answered that you NEVER USED (Q501) AND DID NOT USE ANY SUS SERVICE (Q502), thank you for participating and end the interview.
- If you answered any of the other items in the previous questions, continue below.

**Q503- For you, the Unified Health System is:**

1. ☐ Indispensable/Essential  
2. ☐ Complement the private network  
3. ☐ Indifferent  
4. ☐ Unnecessary  
8. ☐ I don't know  
9. ☐ I didn't want to answer

**Q504- Do you know of any SUS program or initiative that is:**

1. ☐ Yes 2. ☐ No 3. ☐ Don't know 4. ☐ Didn't want to answer

**Q505- Are you registered with a Health Unit and/or Municipality's Family Health Strategy?**

1. ☐ Yes 2. ☐ No 3. ☐ Don't know 4. ☐ Didn't want to answer

**Q506- Do you collect medicines from a public health unit that is registered**

1. ☐ Yes 2. ☐ I didn't want to answer 8. ☐ Don't know 9. ☐ No

**Q507- What is your opinion about this type of service to be carried out by UBS and/or ESF?**

1. ☐ Very good 2. ☐ Good 3. ☐ Neither good nor bad 4. ☐ Bad 5. ☐ Very bad 8. ☐ I don't know  
9. ☐ I didn't want to answer

**Q508- Your medical appointments are carried out:**

1. ☐ Only in the SUS 2. ☐ Only through the Health Plan 3. ☐ SUS and HealthPlan 8. ☐ Don't know 9. ☐ Didn't want to answer

**Q509- Do you consider the process for scheduling medical appointments with a general practitioner through the SUS:**

1. ☐ Very good 2. ☐ Good 3. ☐ Neither good nor bad 4. ☐ Bad 5. ☐ Very bad 8. ☐ I don't know 9. ☐ I didn't want to answer

**Q510- Do you consider the process for scheduling appointments with specialists (ophthalmologist/ cardiologist) through the SUS:**

1. ☐ Very good 2. ☐ Good 3. ☐ Neither good nor bad 4. ☐ Bad 5. ☐ Very bad 8. ☐ I don't know 9. ☐ I didn't want to answer

**Q511- Do you consider the medical care offered by the SUS to be:**

1. ☐ Very good 2. ☐ Good 3. ☐ Neither good nor bad 4. ☐ Bad 5. ☐ Very bad 8. ☐ I don't know 9. ☐ I didn't want to answer

**Q512- Do you consider access to public health services as:**

1. ☐ Very good 2. ☐ Good 3. ☐ Neither good nor bad 4. ☐ Bad 5. ☐ Very bad 8. ☐ I don't know 9. ☐ I didn't want to answer

**Q513- One of the objectives of our study is to evaluate citizens' perception of access to healthcare, which means "the capacity of the healthcare system to provide the necessary care and services, at the right time and in the right place". How do you evaluate access to health services offered by the SUS:**

1. ☐ Very good 2. ☐ Good 3. ☐ Neither good nor bad 4. ☐ Bad 5. ☐ Very bad 8. ☐ I don't know 9. ☐ I didn't want to answer

**Q514- You were not served and/or were unable to access some type of service in the SUS in the last two years:**

1. ☐ Yes 2. ☐ No 8. ☐ Don't know 9. ☐ Didn't want to answer If yes, what type of service?

**Q515- For you, what is the most important thing associated with the quality of health services:**

1. ☐ Agility in scheduling service 2. ☐ Geographical ease of location where the service will be performed 3. ☐ Agility in service. 4. ☐ Friendly welcome from professionals 4. ☐ Satisfactory environment (physical structure, comfort,

cleanliness, accessibility) 5. ☐ Humanized service 8. ☐ I don't know 9. ☐ I didn't want to answer

**Q516- In your opinion, what is the most important factor to be improved regarding public health services:**

1. ☐ Infrastructure 2. ☐ Qualification of professionals 3. ☐ Greater ease of access to medicines 4. ☐ Expansion of the number of health service units (UBS/ESF/ Hospitals) 5. ☐ Expansion of services offered (e.g. increase in the number of consultations) 6. ☐ Easier access to medicines 8. ☐ I don't know 9. ☐ I didn't want to answer 10. ☐ Other: \_\_\_\_\_

**Q517- How do you evaluate the quality of health services offered by the SUS:**

1. ☐ Very good 2. ☐ Good 3. ☐ Neither good nor bad 4. ☐ Bad 5. ☐ Very bad 8. ☐ I don't know 9. ☐ I didn't want to answer

**Q518- Have you ever had to use SUS services in another municipality other than yours?**

1. ☐ Always 2. ☐ Often 3. ☐ Sometimes 4. ☐ Rarely 5. ☐ Never 6. ☐ I don't know 7. ☐ I didn't want to answer

**Q519- If yes, which one?** 1. ☐ Clinical consultation 2. ☐ Surgery 3.

☐ Consultation with a specialist 4. ☐ I don't know 7. ☐ I didn't want to answer

**Q520- How do you purchase your medicines?**

1. ☐ Only privately (purchase in drugstores/ private pharmacies). 2. ☐ Only free of charge in PUBLIC PHARMACIES  
3. ☐ Both free of charge and privately.  
4. ☐ Donation from friends/ family. 8. ☐ I don't know  
9. ☐ I didn't want to answer

**Q521- Is this place far from your home? medicines provide information and/or guidance about**

1. Yes ☐ 2. More or less ☐ 3. No ☐ 8. I don't know ☐

**Q522- How do you get to the place to purchase your medicine through SUS?** *[You can select more than one option.]*

1. ☐ Walking 2. ☐ Bus and/or public transport 3. ☐ Car 4. ☐ Motorcycle 5. ☐ Bicycle 6. ☐ Other: \_\_\_\_\_  
8. ☐ I don't know 9. ☐ I didn't want to answer

**Q523- Do the employees of the SUS PUBLIC PHARMACIES where you collect your medicines serve you with respect and courtesy?**

1. ☐ Always 2. ☐ Often 3. ☐ Sometimes 4. ☐ Rarely 5. ☐ Never 8. ☐ NS 9. ☐ NR

**Q524- Is the SUS PUBLIC PHARMACY where you get your medicines a clean and organized environment?**

1. ☐ Always 2. ☐ Often 3. ☐ Sometimes 4. ☐ Rarely 5. ☐ Never 8. ☐ NS 9. ☐ NR

**Q525- The opening hours of the SUS PUBLIC PHARMACY where you look for medicines are:**

1. ☐ Very good 2. ☐ Good 3. ☐ Neither good nor bad 4. ☐ Bad 5. ☐ Very bad 8. ☐ NS 9. ☐ NR

**Q526- In the last three months, have you SEARCHED for any medicine in SUS PUBLIC PHARMACIES?**

1. ☐ Always 2. ☐ Often 3. ☐ Sometimes 4. ☐ Rarely 5. ☐ Never 8. ☐ NS 9. ☐ NR

**Q527- In the last three months, how often did you GET the medicines you were looking for FROM SUS PUBLIC PHARMACIES?**

1. ☐ Always 2. ☐ Often 3. ☐ Sometimes 4. ☐ Rarely 5. ☐ Never 8. ☐ NS 9. ☐ NR

**Q528- Normally, how long do you wait to collect medicines from pharmacies?**

1. ☐ The same day 2. ☐ The next day 3. ☐ Three days later 4. ☐ One week later  
5. ☐ 15 days later 6. ☐ More than 15 days later 7. ☐ Other: \_\_\_\_\_ 8. ☐ I don't know 9. ☐ NR

**Q529- When you pick up medicine from PHARMACIES PUBLIC SUS, the employees who deliver the how to use them?**

1. ☐ Always 2. ☐ Often 3. ☐ Sometimes 4. ☐ Rarely 5. ☐ Never 8. ☐ NS 9. ☐ NR

**Q530- When you pick up medicines from public SUS pharmacies, do you receive guidance on how to store medicines at home?**

1. ☐ Always 2. ☐ Often 3. ☐ Sometimes 4. ☐ Rarely 5. ☐ Never 8. ☐ NS 9. ☐ NR

**Q531 - Is the pharmacist or other employee of SUS PUBLIC PHARMACIES available when you need to answer questions about medicines?**

1. ☐ Always 2. ☐ Often 3. ☐ Sometimes 4. ☐ Rarely 5. ☐ Never 8. ☐ I don't know 9. ☐ I didn't want to answer

**Q532 - Have you already met the pharmaceutical professional at the public unit you frequent (ESF, UBS, medication dispensing)?**

1. ☐ Always 2. ☐ Often 3. ☐ Sometimes 4. ☐ Rarely 5. ☐ Never 8. ☐ I don't know 9. ☐ I didn't want to answer

**Q533 - If yes, do you know what services are provided by the pharmaceutical professional?**

1. Yes ☐ 2. More or less ☐ 3. No ☐ 4. I don't know ☐

**Q534 - In your municipality, is there a pharmacist in a Basic Health Unit and/or ESF?**

1. ☐ Yes 2. ☐ No 8. ☐ I don't know 9. ☐ I didn't want to answer

**Q535 - How do you evaluate the role of the pharmacist in the process of providing guidance on the use of medicines:**

1. ☐ Indispensable/Essential 2. ☐ Indifferent 3. ☐ Unnecessary 8. ☐ I don't know/ I've never received advice from a pharmacist 9. ☐ I didn't want to answer

**Q536 - In your opinion, what is the main contribution of the pharmacist to Primary Health Care?**

1. ☐ Organization of administrative demands regarding medicines 2. ☐ Pharmaceutical guidance/care on the use of medicines  
3. ☐ Contribute to the health actions and activities of a multidisciplinary team 8. ☐ I don't know 9. ☐ I didn't want to respond

**THANK YOU FOR YOUR PARTICIPATION AND AVAILABILITY!**
